# Supplementary material for: Caffeine Compromises Proliferation of Human Hippocampal Progenitor Cells
Source: Front Cell Dev Biol. 2020 Sep 8;8:806. doi: 10.3389/fcell.2020.00806 (PMC7505931; doi:10.3389/fcell.2020.00806)
Supplement: Supplementary file 2 [file Table_1.xlsx]

## Sheet: Houghton et al. Variable Values
	Variable	Values	Condition
	Exposure	1	Acute
		2	Repeated
	Caffeine	0	Control
		1	0.1mM
		2	0.25mM
		3	0.5mM
		4	1.0mM

## Sheet: Houghton et al. Dataset
n	Exposure	Caffeine	DAPI	Ki67	CC3	Ki67CC3	Nestin	SOX2	NestSOX2	Passage#
1	1	0	184.7	70.57	11.52	8.41	98.34	97.26	96.12	21
1	1	1	174.35	66.65	14.51	10.48	98.32	98.79	97.48	21
1	1	2	160.36	62.78	15.48	11.08	97.79	98.31	96.61	21
1	1	3	183.25	66.89	9.59	7.1	97.52	98.5	96.56	21
1	1	4	110.79	63.87	4.72	2.92	97.59	97.73	95.63	21
1	2	0	103.11	55.23	13.16	7.49	98.39	98.96	97.99	21
1	2	1	73.76	59.58	12.97	8.56	97.78	99.32	97.48	21
1	2	2	127.29	55.57	5.65	3.43	98.23	99.41	97.79	21
1	2	3	56.1	43.29	10.08	5.11	96.3	97.94	95.8	21
1	2	4	23.72	35.28	10.54	4.66	93.25	95.26	92.11	21
2	1	0	169.46	65.21	3.72	2.16	98.56	98.29	97.44	21
2	1	1	206.53	60.42	7.44	4.54	98.58	98.38	97.15	21
2	1	2	131.73	64.07	8.75	6.16	97.9	98.74	97.27	21
2	1	3	181.78	62.57	6.11	3.52	98.67	98.71	97.53	21
2	1	4	101.96	46.7	3.65	1.11	98.27	96.79	95.28	21
2	2	0	207.75	61.99	12.97	8.27	97.11	93.98	89.92	21
2	2	1	292.83	67.88	12.4	9.79	98.73	98.14	96.93	21
2	2	2	258.26	67.76	11.22	8.65	98.71	98.02	96.8	21
2	2	3	249.81	59.65	10.74	7.76	98.58	97.17	95.91	21
2	2	4	94.25	47.68	11.1	6.04	96.61	94.17	92.06	21
3	1	0	161.31	66.38	9.09	6.11	97.5	98.91	96.87	21
3	1	1	140.05	60.92	4.83	2.84	98.9	99	98.15	21
3	1	2	157.32	63.6	6.14	3.99	98.25	98.82	97.5	21
3	1	3	111.78	58.53	6.74	4.01	98.29	98.54	97.46	21
3	1	4	67.64	52.87	1.55	0.71	97.06	97.97	96.56	21
3	2	0	164.97	68.6	6.33	4.59	99.39	99.31	98.92	21
3	2	1	139.22	66.28	3.08	2.12	98.92	99.06	98.39	21
3	2	2	116.61	64.72	3.75	2.69	98.48	98.77	97.74	21
3	2	3	101.61	52.22	1.98	1.02	98.5	98.9	97.91	21
3	2	4	46.42	34.18	1.42	0.25	97.34	96.38	95.92	21
